# Supplementary material for: Psychometric Properties of the Short-Form Geriatric Depression Scale (GDS-SF) and Its Associated Factors among the Elderly in Bangladesh
Source: MDPI journal article supplement (doi:10.3390/ijerph19137935), 2022-06-28
Supplement: s1 [file s1]

## Psychometric properties of the Short-Form Geriatric Depression Scale (GDS-SF) and its associated factors among the elderly in Bangladesh

**SUPPLEMENTARY TABLE S1** | Spearman's correlation coefficients (rho) of study independent variables.

|                                                 | Living place | Age   | Sex   | Marital status | Education | Previous Occupation | House owner | Religious practice | Comorbidity | Having children | Surrounding people's support <sup>a</sup> | Peer's support <sup>b</sup> | Children's support satisfaction | Sleep duration | Taking sleeping pills |
|-------------------------------------------------|--------------|-------|-------|----------------|-----------|---------------------|-------------|--------------------|-------------|-----------------|-------------------------------------------|-----------------------------|---------------------------------|----------------|-----------------------|
| <b>Living place</b>                             | 1.00         |       |       |                |           |                     |             |                    |             |                 |                                           |                             |                                 |                |                       |
| <b>Age</b>                                      | 0.02         | 1.00  |       |                |           |                     |             |                    |             |                 |                                           |                             |                                 |                |                       |
| <b>Sex</b>                                      | -0.06        | 0.07  | 1.00  |                |           |                     |             |                    |             |                 |                                           |                             |                                 |                |                       |
| <b>Marital status</b>                           | -0.13*       | -0.05 | 0.37* | 1.00           |           |                     |             |                    |             |                 |                                           |                             |                                 |                |                       |
| <b>Education</b>                                | -0.32*       | 0.04  | -0.04 | -0.08          | 1.00      |                     |             |                    |             |                 |                                           |                             |                                 |                |                       |
| <b>Previous Occupation</b>                      | 0.06         | -0.01 | 0.37* | 0.21**         | -0.05     | 1.00                |             |                    |             |                 |                                           |                             |                                 |                |                       |
| <b>House owner</b>                              | 0.49*        | 0.01  | -0.01 | -0.07          | -0.19**   | -0.16**             | 1.00        |                    |             |                 |                                           |                             |                                 |                |                       |
| <b>Religious practice</b>                       | 0.33*        | 0.08  | 0.04  | -0.05          | -0.14**   | -0.07               | 0.28*       | 1.00               |             |                 |                                           |                             |                                 |                |                       |
| <b>Comorbidity</b>                              | 0.01         | 0.12* | 0.06  | 0.07           | -0.07     | -0.07               | 0.13*       | 0.11*              | 1.00        |                 |                                           |                             |                                 |                |                       |
| <b>Having children</b>                          | -0.07        | 0.05  | 0.05  | 0.29**         | -0.05     | -0.10               | -0.08       | -0.07              | 0.13*       | 1.00            |                                           |                             |                                 |                |                       |
| <b>Surrounding people's support<sup>a</sup></b> | 0.23*        | -0.08 | -0.02 | 0.07           | -0.14**   | 0.04                | 0.19*       | 0.10               | 0.04        | 0.11*           | 1.00                                      |                             |                                 |                |                       |
| <b>Peer's support<sup>b</sup></b>               | 0.17*        | -0.05 | 0.05  | 0.16**         | -0.16**   | 0.05                | 0.14*       | 0.14**             | 0.09        | 0.16**          | 0.63**                                    | 1.00                        |                                 |                |                       |
| <b>Children's support satisfaction</b>          | 0.05         | 0.05  | 0.06  | 0.13*          | -0.13*    | 0.09                | 0.10        | 0.03               | 0.07        | 0.42**          | 0.37**                                    | 0.31**                      | 1.00                            |                |                       |

|                              |            |       |      |       |       |       |            |        |      |       |      |       |      |       |      |
|------------------------------|------------|-------|------|-------|-------|-------|------------|--------|------|-------|------|-------|------|-------|------|
| <b>Sleep duration</b>        | -0.04      | -0.03 | 0.06 | 0.01  | 0.12* | 0.04  | 0.04       | 0.03   | 0.05 | -0.04 | 0.06 | -0.02 | 0.03 | 1.00  |      |
| <b>Taking sleeping pills</b> | 0.32*<br>* | -0.03 | 0.01 | -0.04 | -0.09 | -0.03 | 0.28*<br>* | 0.14** | 0.08 | 0.01  | 0.09 | 0.02  | 0.01 | -0.02 | 1.00 |

\* $p < 0.05$ ; \*\* $p < 0.01$ .

<sup>a</sup> Getting support from surrounding people; <sup>b</sup> Getting support from peers.
